# Supplementary material for: Genetic Diversity in Invasive Populations of Lupinus polyphyllus Lindl. and Heracleum sosnowskyi Manden.
Source: MDPI journal article supplement (doi:10.3390/biology10111094), 2021-10-25
Supplement: s1 [file s1]

Figure S1: Map of the lupin sampled populations.

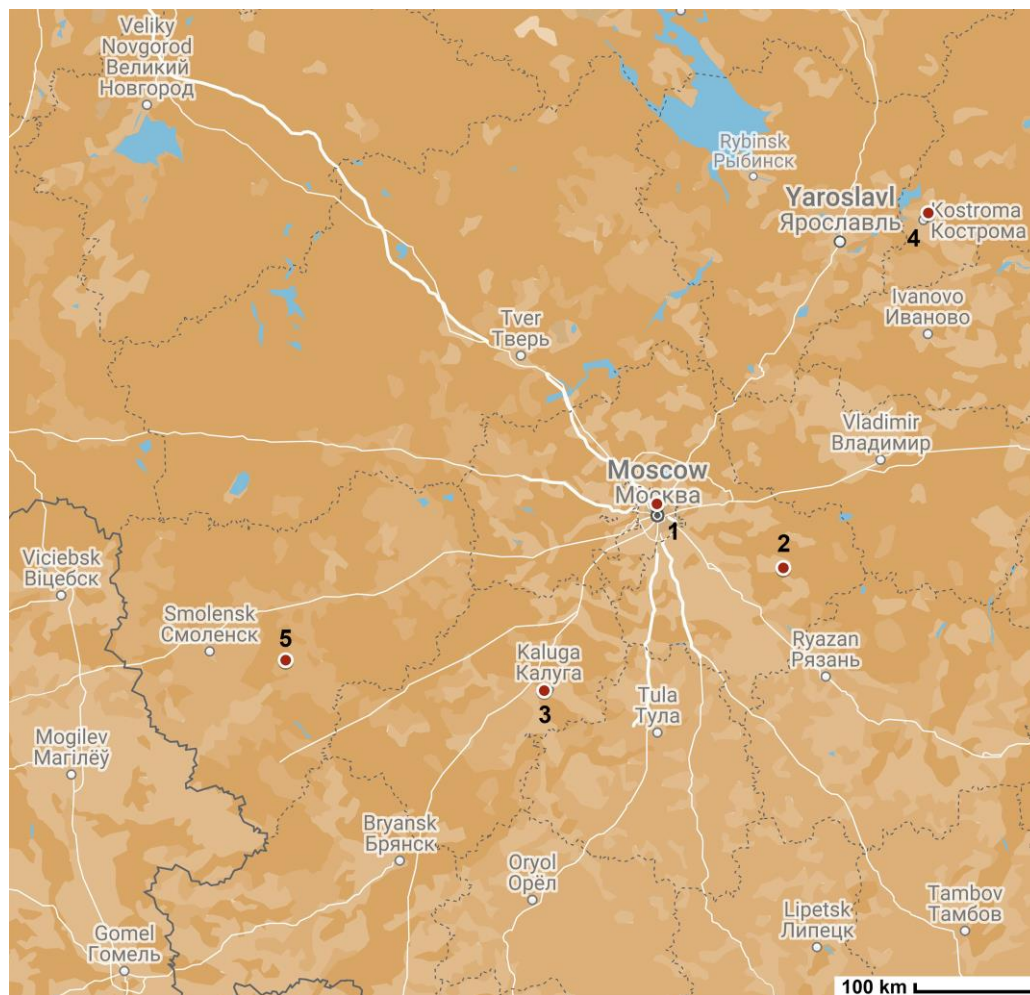

1. MBG (Moscow Botany Garden) territory, 2. Moscow region, 3. Kaluga region, 4. Kostroma region, 5 Smolensk region

Figure S2: Map of the hogweed sampled populations.

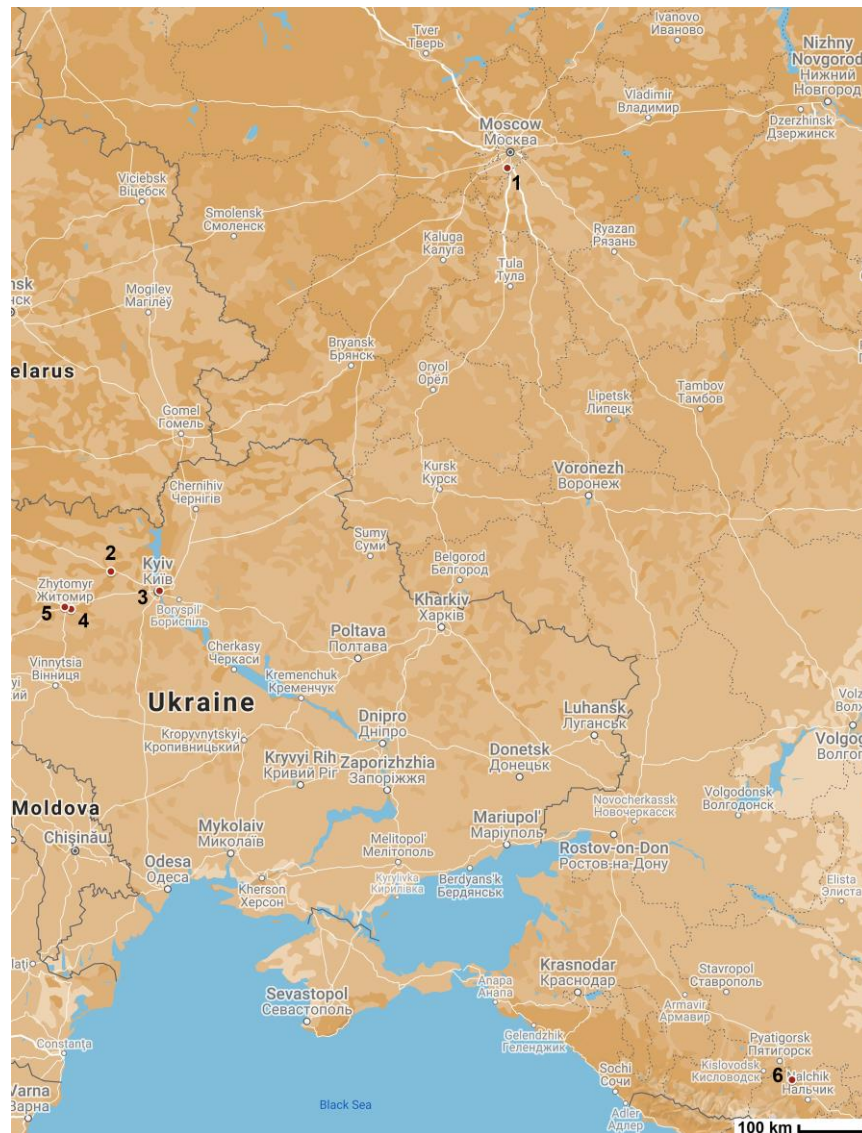

1. Moscow, Russia; 2. Peskovka, Ukraine; 3. Kiev, Ukraine; 4. Zhitomir (industrial), Ukraine; 5. Zhitomir (center), Ukraine; 6. Caucasus, Russia

Table S1: The primers used in the experiment.

| technique   | primer        | sequence (5' - 3')     | T °C | reference |
|-------------|---------------|------------------------|------|-----------|
| <b>RAPD</b> | <b>A-12</b>   | ATC-GCA-CAC-T          | 37   | [1]       |
|             | <b>AD-04</b>  | GTA-GGC-CTC-A          | 37   |           |
|             | <b>AE-07</b>  | GTG-TCA-GTG-G          | 37   |           |
|             | <b>AE-13</b>  | TGT-GGA-CTG-G          | 37   |           |
|             | <b>Ag-1</b>   | AGG-TCA-CTG-A          | 37   |           |
|             | <b>AH-29</b>  | TGG-TGA-CTG-A          | 37   |           |
|             | <b>AH-30</b>  | TGG-TCA-CTG-T          | 37   |           |
|             | <b>E-16</b>   | GGT-GAC-TGT-G          | 37   |           |
|             | <b>M-06</b>   | CTG-GGC-AAC-T          | 37   |           |
|             | <b>M-07</b>   | CCG-TGA-CTC-A          | 37   |           |
|             | <b>M-14</b>   | AGG-GTC-GTT-C          | 37   |           |
|             | <b>NO-15</b>  | CAG-CGA-CTG-T          | 37   |           |
|             | <b>O-07</b>   | CAG-CAC-TGA-C          | 37   |           |
|             | <b>OPA-02</b> | TGC-CGA-GCT-G          | 37   |           |
|             | <b>OPA-04</b> | AGT-CAG-CCA-C          | 37   |           |
|             | <b>OPC-09</b> | CTC-ACC-GTC-C          | 37   |           |
|             | <b>Q-09</b>   | GGC-TAA-CCG-A          | 37   |           |
|             | <b>Q-20</b>   | TCG-CCC-AGT-C          | 37   |           |
|             | <b>R-03</b>   | ACA-CAG-AGG-G          | 37   |           |
|             | <b>R-06</b>   | GTC-TAC-GGC-A          | 37   |           |
|             | <b>R-11</b>   | GTA-GCC-GTC-T          | 37   |           |
|             | <b>R-12</b>   | ACA-GGT-GCG-T          | 37   |           |
|             | <b>V-03</b>   | CTC-CCT-GCA-A          | 37   |           |
|             | <b>V-20</b>   | CAG-CAT-GGT-C          | 37   |           |
|             | <b>X-01</b>   | CTG-GGC-ACG-A          | 37   |           |
|             | <b>X-15</b>   | CAG-ACA-AGC-C          | 37   |           |
|             | <b>G-1</b>    | CCT-GTT-AGC-C          | 37   |           |
|             | <b>Leb-10</b> | AGC-CGC-AGC-T          | 37   |           |
|             | <b>P-10</b>   | AGG-CGG-GTA-C          | 37   |           |
|             | <b>P-11</b>   | AGG-CGG-GAA-CG         | 37   |           |
|             | <b>P-474</b>  | AGG-CGG-GAA-C          | 37   |           |
|             | <b>P-318</b>  | CGG-AGA-GCG-A          | 37   |           |
|             | <b>P-340</b>  | GAG-AGG-CAC-C          | 37   |           |
|             | <b>P-450</b>  | CGG-AGA-GCC-C          | 37   |           |
|             | <b>QR-1</b>   | CGG-TCA-CTG-T          | 37   |           |
|             | <b>QR-2</b>   | CGG-CCA-CTG-T          | 37   |           |
|             | <b>QR-3</b>   | CGG-CCC-CTG-T          | 37   |           |
|             | <b>QR-4</b>   | CGG-CCC-CGG-T          | 37   |           |
|             | <b>QR-5</b>   | CGG-CCC-CGG-C          | 37   |           |
| <b>ISSR</b> | <b>M-1</b>    | (AC) <sub>8</sub> CG   | 55   | [2]       |
|             | <b>M-2</b>    | (AC) <sub>8</sub> C/CT | 55   |           |
|             | <b>M-6</b>    | (CAC) <sub>5</sub>     | 50   |           |
|             | <b>M-7</b>    | (CAG) <sub>5</sub>     | 50   |           |
|             | <b>M-8</b>    | (GTG) <sub>5</sub>     | 50   |           |
|             | <b>M-9</b>    | (GACAC) <sub>4</sub>   | 40   |           |
|             | <b>M-10</b>   | (CA) <sub>6</sub> A/GG | 45   |           |
|             | <b>M-11</b>   | (CA) <sub>6</sub> A/G  | 45   |           |
|             | <b>M-12</b>   | (CA) <sub>6</sub> RY   | 50   |           |
|             | <b>M-13</b>   | (AGC) <sub>3</sub> Y   | 40   |           |
|             | <b>MS1</b>    | (CA) <sub>8</sub> AC   | 37   |           |

|                      |               |                                             |    |          |
|----------------------|---------------|---------------------------------------------|----|----------|
|                      | MS2           | (AG) 8CA                                    | 45 | [3]      |
|                      | MS3           | (AG) 8TA                                    | 45 |          |
|                      | MS4           | (AC) 9T                                     | 55 | [4]      |
|                      | MS5           | (AGC) 6T                                    | 50 |          |
|                      | MS6           | (GAG) 6C                                    | 60 | [5]      |
|                      | MS7           | (GA) 8CAG                                   | 55 |          |
|                      |               |                                             |    |          |
| LTR                  | Wis-2-1-A     | CTA-GGG-CAT-AAT-TCC-AAC-AA                  |    | [6]      |
|                      | TarI          | CTC-CCA-GTT-GAC-CAA-CAA                     |    |          |
|                      | Tagermina     | AGA-GGA-GGA-TAT-CCC-AAC-CAT                 |    |          |
|                      | Thv19         | GCC-CAA-CCG-ACC-AGG-TTG-TTA-CAG             |    |          |
|                      |               |                                             |    |          |
| REMAP<br>for lupine  | MS7+Wis-2-1-A | (GA) 8CAG<br>CTA-GGG-CAT-AAT-TCC-AAC-AA     | 55 | ISSR+LTR |
|                      | MS4+TarI      | (AC) 9T<br>CTC-CCA-GTT-GAC-CAA-CAA          | 50 |          |
|                      | MS1+Tagermina | (CA) 8AC<br>AGA-GGA-GGA-TAT-CCC-AAC-CAT     | 50 |          |
|                      | MS3+Tagermina | (AG) 8TA<br>AGA-GGA-GGA-TAT-CCC-AAC-CAT     | 55 |          |
|                      | MS2+Thv19     | (AG) 8CA<br>GCC-CAA-CCG-ACC-AGG-TTG-TTA-CAG | 50 |          |
|                      |               |                                             |    |          |
| REMAP<br>for hogweed | MS1+Wis-2-1-A | (CA) 8AC<br>CTA-GGG-CAT-AAT-TCC-AAC-AA      | 55 | ISSR+LTR |
|                      | MS1+TarI      | (CA) 8AC<br>CTC-CCA-GTT-GAC-CAA-CAA         | 55 |          |
|                      | MS2+TarI      | (AG) 8CA<br>CTC-CCA-GTT-GAC-CAA-CAA         | 55 |          |
|                      | MS3+Thv19     | (AG) 8TA<br>GCC-CAA-CCG-ACC-AGG-TTG-TTA-CAG | 50 |          |
|                      | MS3+Tagermina | (AG) 8TA<br>AGA-GGA-GGA-TAT-CCC-AAC-CAT     | 55 |          |
|                      | MS4+ TarI     | (AC) 9T<br>CTC-CCA-GTT-GAC-CAA-CAA          | 55 |          |
|                      | MS6+Thv19     | (GAG) 6C<br>GCC-CAA-CCG-ACC-AGG-TTG-TTA-CAG | 60 |          |

Table S2: Genetic diversity within lupin invasive population obtained by combinations of RAPD, ISSR and REMAP data

|        | Kostr1 | Kostr2 | Kostr3 | Kostr4 | Kostr5 | Kostr6 | Kostr7 | Smo11 | Smo12 | Smo13 | Smo14 | Smo15 | Smo16 | Smo17 | Smo18 | Smo19 | Smo110 | Mosc1 | Mosc2 | Mosc3 | Mosc4 | Mosc5 | Mosc6 | Mosc7 | Mosc8 | Mosc9 | Ka11  | Ka12  | Ka13  | Ka14  | Ka15  | Ka16  | Ka17  | Ka18  |
|--------|--------|--------|--------|--------|--------|--------|--------|-------|-------|-------|-------|-------|-------|-------|-------|-------|--------|-------|-------|-------|-------|-------|-------|-------|-------|-------|-------|-------|-------|-------|-------|-------|-------|-------|
| Kostr1 | 0.000  |        |        |        |        |        |        |       |       |       |       |       |       |       |       |       |        |       |       |       |       |       |       |       |       |       |       |       |       |       |       |       |       |       |
| Kostr2 | 0.221  | 0.000  |        |        |        |        |        |       |       |       |       |       |       |       |       |       |        |       |       |       |       |       |       |       |       |       |       |       |       |       |       |       |       |       |
| Kostr3 | 0.240  | 0.200  | 0.000  |        |        |        |        |       |       |       |       |       |       |       |       |       |        |       |       |       |       |       |       |       |       |       |       |       |       |       |       |       |       |       |
| Kostr4 | 0.241  | 0.281  | 0.164  | 0.000  |        |        |        |       |       |       |       |       |       |       |       |       |        |       |       |       |       |       |       |       |       |       |       |       |       |       |       |       |       |       |
| Kostr5 | 0.207  | 0.237  | 0.233  | 0.257  | 0.000  |        |        |       |       |       |       |       |       |       |       |       |        |       |       |       |       |       |       |       |       |       |       |       |       |       |       |       |       |       |
| Kostr6 | 0.254  | 0.214  | 0.186  | 0.189  | 0.247  | 0.000  |        |       |       |       |       |       |       |       |       |       |        |       |       |       |       |       |       |       |       |       |       |       |       |       |       |       |       |       |
| Kostr7 | 0.268  | 0.262  | 0.198  | 0.188  | 0.285  | 0.188  | 0.000  |       |       |       |       |       |       |       |       |       |        |       |       |       |       |       |       |       |       |       |       |       |       |       |       |       |       |       |
| Smo11  | 0.259  | 0.301  | 0.285  | 0.321  | 0.313  | 0.313  | 0.367  | 0.000 |       |       |       |       |       |       |       |       |        |       |       |       |       |       |       |       |       |       |       |       |       |       |       |       |       |       |
| Smo12  | 0.284  | 0.301  | 0.261  | 0.310  | 0.325  | 0.337  | 0.304  | 0.269 | 0.000 |       |       |       |       |       |       |       |        |       |       |       |       |       |       |       |       |       |       |       |       |       |       |       |       |       |
| Smo13  | 0.266  | 0.295  | 0.244  | 0.314  | 0.306  | 0.282  | 0.333  | 0.104 | 0.252 | 0.000 |       |       |       |       |       |       |        |       |       |       |       |       |       |       |       |       |       |       |       |       |       |       |       |       |
| Smo14  | 0.278  | 0.306  | 0.256  | 0.314  | 0.318  | 0.329  | 0.321  | 0.252 | 0.276 | 0.212 | 0.000 |       |       |       |       |       |        |       |       |       |       |       |       |       |       |       |       |       |       |       |       |       |       |       |
| Smo15  | 0.237  | 0.266  | 0.227  | 0.285  | 0.276  | 0.253  | 0.314  | 0.126 | 0.234 | 0.069 | 0.218 | 0.000 |       |       |       |       |        |       |       |       |       |       |       |       |       |       |       |       |       |       |       |       |       |       |
| Smo16  | 0.325  | 0.329  | 0.301  | 0.325  | 0.304  | 0.391  | 0.359  | 0.247 | 0.234 | 0.230 | 0.230 | 0.224 | 0.000 |       |       |       |        |       |       |       |       |       |       |       |       |       |       |       |       |       |       |       |       |       |
| Smo17  | 0.249  | 0.288  | 0.239  | 0.296  | 0.299  | 0.276  | 0.325  | 0.102 | 0.246 | 0.034 | 0.195 | 0.045 | 0.212 | 0.000 |       |       |        |       |       |       |       |       |       |       |       |       |       |       |       |       |       |       |       |       |
| Smo18  | 0.337  | 0.352  | 0.291  | 0.337  | 0.306  | 0.341  | 0.393  | 0.265 | 0.265 | 0.249 | 0.237 | 0.243 | 0.268 | 0.232 | 0.000 |       |        |       |       |       |       |       |       |       |       |       |       |       |       |       |       |       |       |       |
| Smo19  | 0.277  | 0.294  | 0.243  | 0.314  | 0.293  | 0.281  | 0.333  | 0.113 | 0.250 | 0.042 | 0.210 | 0.076 | 0.241 | 0.053 | 0.247 | 0.000 |        |       |       |       |       |       |       |       |       |       |       |       |       |       |       |       |       |       |
| Smo110 | 0.298  | 0.267  | 0.228  | 0.322  | 0.361  | 0.349  | 0.366  | 0.284 | 0.160 | 0.219 | 0.231 | 0.214 | 0.250 | 0.214 | 0.267 | 0.217 | 0.000  |       |       |       |       |       |       |       |       |       |       |       |       |       |       |       |       |       |
| Mosc1  | 0.289  | 0.304  | 0.257  | 0.258  | 0.304  | 0.315  | 0.295  | 0.322 | 0.333 | 0.315 | 0.348 | 0.276 | 0.291 | 0.286 | 0.326 | 0.315 | 0.322  | 0.000 |       |       |       |       |       |       |       |       |       |       |       |       |       |       |       |       |
| Mosc2  | 0.356  | 0.292  | 0.266  | 0.311  | 0.314  | 0.326  | 0.341  | 0.345 | 0.333 | 0.349 | 0.360 | 0.318 | 0.313 | 0.318 | 0.337 | 0.349 | 0.333  | 0.140 | 0.000 |       |       |       |       |       |       |       |       |       |       |       |       |       |       |       |
| Mosc3  | 0.369  | 0.372  | 0.310  | 0.322  | 0.325  | 0.397  | 0.337  | 0.358 | 0.370 | 0.337 | 0.361 | 0.341 | 0.325 | 0.329 | 0.384 | 0.323 | 0.345  | 0.167 | 0.184 | 0.000 |       |       |       |       |       |       |       |       |       |       |       |       |       |       |
| Mosc4  | 0.342  | 0.383  | 0.292  | 0.317  | 0.321  | 0.384  | 0.377  | 0.395 | 0.368 | 0.358 | 0.321 | 0.337 | 0.360 | 0.350 | 0.370 | 0.321 | 0.316  | 0.247 | 0.280 | 0.241 | 0.000 |       |       |       |       |       |       |       |       |       |       |       |       |       |
| Mosc5  | 0.329  | 0.311  | 0.261  | 0.274  | 0.264  | 0.264  | 0.302  | 0.317 | 0.353 | 0.299 | 0.368 | 0.270 | 0.358 | 0.281 | 0.367 | 0.287 | 0.329  | 0.168 | 0.184 | 0.121 | 0.227 | 0.000 |       |       |       |       |       |       |       |       |       |       |       |       |
| Mosc6  | 0.349  | 0.318  | 0.257  | 0.303  | 0.306  | 0.283  | 0.310  | 0.373 | 0.337 | 0.341 | 0.376 | 0.333 | 0.341 | 0.333 | 0.330 | 0.341 | 0.360  | 0.163 | 0.191 | 0.174 | 0.247 | 0.164 | 0.000 |       |       |       |       |       |       |       |       |       |       |       |
| Mosc7  | 0.333  | 0.315  | 0.277  | 0.311  | 0.314  | 0.303  | 0.318  | 0.310 | 0.298 | 0.291 | 0.360 | 0.274 | 0.325 | 0.285 | 0.326 | 0.291 | 0.322  | 0.172 | 0.178 | 0.195 | 0.256 | 0.173 | 0.124 | 0.000 |       |       |       |       |       |       |       |       |       |       |
| Mosc8  | 0.337  | 0.352  | 0.270  | 0.271  | 0.318  | 0.318  | 0.298  | 0.337 | 0.337 | 0.307 | 0.341 | 0.289 | 0.329 | 0.289 | 0.341 | 0.295 | 0.337  | 0.134 | 0.149 | 0.131 | 0.200 | 0.122 | 0.162 | 0.127 | 0.000 |       |       |       |       |       |       |       |       |       |
| Mosc9  | 0.337  | 0.284  | 0.246  | 0.292  | 0.341  | 0.283  | 0.321  | 0.301 | 0.325 | 0.318 | 0.353 | 0.277 | 0.341 | 0.288 | 0.295 | 0.306 | 0.337  | 0.185 | 0.169 | 0.174 | 0.272 | 0.198 | 0.170 | 0.180 | 0.162 | 0.000 |       |       |       |       |       |       |       |       |
| Ka11   | 0.361  | 0.272  | 0.314  | 0.349  | 0.306  | 0.318  | 0.382  | 0.288 | 0.325 | 0.306 | 0.282 | 0.276 | 0.354 | 0.287 | 0.306 | 0.281 | 0.349  | 0.337 | 0.314 | 0.349 | 0.396 | 0.310 | 0.341 | 0.337 | 0.330 | 0.295 | 0.000 |       |       |       |       |       |       |       |
| Ka12   | 0.273  | 0.254  | 0.238  | 0.275  | 0.277  | 0.277  | 0.267  | 0.333 | 0.308 | 0.301 | 0.277 | 0.282 | 0.299 | 0.294 | 0.349 | 0.288 | 0.285  | 0.243 | 0.216 | 0.224 | 0.303 | 0.271 | 0.266 | 0.240 | 0.244 | 0.231 | 0.289 | 0.000 |       |       |       |       |       |       |
| Ka13   | 0.282  | 0.310  | 0.260  | 0.273  | 0.287  | 0.251  | 0.349  | 0.293 | 0.317 | 0.275 | 0.310 | 0.269 | 0.346 | 0.269 | 0.322 | 0.286 | 0.318  | 0.319 | 0.341 | 0.306 | 0.338 | 0.291 | 0.299 | 0.307 | 0.345 | 0.276 | 0.263 | 0.281 | 0.000 |       |       |       |       |       |
| Ka14   | 0.282  | 0.263  | 0.296  | 0.358  | 0.299  | 0.338  | 0.368  | 0.307 | 0.320 | 0.338 | 0.338 | 0.304 | 0.351 | 0.329 | 0.375 | 0.325 | 0.346  | 0.345 | 0.346 | 0.410 | 0.397 | 0.366 | 0.400 | 0.370 | 0.387 | 0.363 | 0.312 | 0.294 | 0.316 | 0.000 |       |       |       |       |
| Ka15   | 0.329  | 0.266  | 0.307  | 0.318  | 0.310  | 0.299  | 0.349  | 0.317 | 0.317 | 0.322 | 0.333 | 0.303 | 0.358 | 0.303 | 0.333 | 0.322 | 0.318  | 0.308 | 0.307 | 0.283 | 0.411 | 0.292 | 0.277 | 0.330 | 0.311 | 0.288 | 0.230 | 0.282 | 0.280 | 0.255 | 0.000 |       |       |       |
| Ka16   | 0.296  | 0.362  | 0.358  | 0.358  | 0.363  | 0.363  | 0.432  | 0.359 | 0.320 | 0.350 | 0.338 | 0.329 | 0.391 | 0.329 | 0.350 | 0.312 | 0.308  | 0.404 | 0.382 | 0.371 | 0.342 | 0.378 | 0.399 | 0.370 | 0.386 | 0.362 | 0.338 | 0.333 | 0.304 | 0.320 | 0.293 | 0.000 |       |       |
| Ka17   | 0.313  | 0.257  | 0.289  | 0.302  | 0.329  | 0.354  | 0.333  | 0.287 | 0.274 | 0.305 | 0.354 | 0.298 | 0.316 | 0.286 | 0.353 | 0.317 | 0.313  | 0.280 | 0.278 | 0.325 | 0.399 | 0.333 | 0.329 | 0.314 | 0.318 | 0.269 | 0.280 | 0.250 | 0.273 | 0.232 | 0.202 | 0.377 | 0.000 |       |
| Ka18   | 0.310  | 0.302  | 0.287  | 0.345  | 0.337  | 0.314  | 0.366  | 0.309 | 0.321 | 0.290 | 0.325 | 0.249 | 0.363 | 0.272 | 0.314 | 0.313 | 0.286  | 0.322 | 0.345 | 0.357 | 0.354 | 0.306 | 0.337 | 0.310 | 0.303 | 0.314 | 0.314 | 0.297 | 0.271 | 0.359 | 0.306 | 0.371 | 0.301 | 0.000 |

Table S3: Genetic diversity within lupin feral MBG population obtained by combination of RAPD, ISSR and REMAP data

|       | MBG1  | MBG2  | MBG3  | MBG4  | MBG5  | MBG6  | MBG7  | MBG8  | MBG9  | MBG10 | MBG11 | MBG12 | MBG13 | MBG14 | MBG15 | MBG16 | MBG17 | MBG18 | MBG19 | MBG20 | MBG21 |
|-------|-------|-------|-------|-------|-------|-------|-------|-------|-------|-------|-------|-------|-------|-------|-------|-------|-------|-------|-------|-------|-------|
| MBG1  | 0.000 |       |       |       |       |       |       |       |       |       |       |       |       |       |       |       |       |       |       |       |       |
| MBG2  | 0.275 | 0.000 |       |       |       |       |       |       |       |       |       |       |       |       |       |       |       |       |       |       |       |
| MBG3  | 0.202 | 0.205 | 0.000 |       |       |       |       |       |       |       |       |       |       |       |       |       |       |       |       |       |       |
| MBG4  | 0.276 | 0.217 | 0.178 | 0.000 |       |       |       |       |       |       |       |       |       |       |       |       |       |       |       |       |       |
| MBG5  | 0.282 | 0.321 | 0.256 | 0.311 | 0.000 |       |       |       |       |       |       |       |       |       |       |       |       |       |       |       |       |
| MBG6  | 0.287 | 0.275 | 0.236 | 0.289 | 0.338 | 0.000 |       |       |       |       |       |       |       |       |       |       |       |       |       |       |       |
| MBG7  | 0.283 | 0.239 | 0.249 | 0.250 | 0.292 | 0.309 | 0.000 |       |       |       |       |       |       |       |       |       |       |       |       |       |       |
| MBG8  | 0.214 | 0.275 | 0.214 | 0.252 | 0.231 | 0.350 | 0.214 | 0.000 |       |       |       |       |       |       |       |       |       |       |       |       |       |
| MBG9  | 0.237 | 0.239 | 0.191 | 0.226 | 0.280 | 0.333 | 0.202 | 0.191 | 0.000 |       |       |       |       |       |       |       |       |       |       |       |       |
| MBG10 | 0.238 | 0.301 | 0.250 | 0.277 | 0.243 | 0.262 | 0.273 | 0.238 | 0.261 | 0.000 |       |       |       |       |       |       |       |       |       |       |       |
| MBG11 | 0.246 | 0.213 | 0.166 | 0.235 | 0.264 | 0.244 | 0.189 | 0.234 | 0.167 | 0.222 | 0.000 |       |       |       |       |       |       |       |       |       |       |
| MBG12 | 0.279 | 0.234 | 0.256 | 0.210 | 0.363 | 0.292 | 0.254 | 0.267 | 0.254 | 0.293 | 0.196 | 0.000 |       |       |       |       |       |       |       |       |       |
| MBG13 | 0.275 | 0.276 | 0.240 | 0.241 | 0.296 | 0.263 | 0.250 | 0.240 | 0.227 | 0.288 | 0.202 | 0.223 | 0.000 |       |       |       |       |       |       |       |       |
| MBG14 | 0.230 | 0.254 | 0.184 | 0.160 | 0.309 | 0.239 | 0.229 | 0.218 | 0.218 | 0.265 | 0.182 | 0.180 | 0.130 | 0.000 |       |       |       |       |       |       |       |
| MBG15 | 0.237 | 0.216 | 0.168 | 0.214 | 0.317 | 0.222 | 0.213 | 0.237 | 0.247 | 0.297 | 0.200 | 0.232 | 0.193 | 0.173 | 0.000 |       |       |       |       |       |       |
| MBG16 | 0.269 | 0.271 | 0.293 | 0.272 | 0.303 | 0.308 | 0.291 | 0.317 | 0.326 | 0.333 | 0.276 | 0.310 | 0.271 | 0.295 | 0.244 | 0.000 |       |       |       |       |       |
| MBG17 | 0.257 | 0.281 | 0.269 | 0.259 | 0.350 | 0.305 | 0.211 | 0.269 | 0.256 | 0.317 | 0.242 | 0.285 | 0.292 | 0.260 | 0.222 | 0.322 | 0.000 |       |       |       |       |
| MBG18 | 0.254 | 0.267 | 0.220 | 0.198 | 0.333 | 0.289 | 0.231 | 0.198 | 0.231 | 0.278 | 0.207 | 0.204 | 0.178 | 0.148 | 0.187 | 0.284 | 0.261 | 0.000 |       |       |       |
| MBG19 | 0.264 | 0.243 | 0.207 | 0.195 | 0.309 | 0.288 | 0.218 | 0.276 | 0.218 | 0.325 | 0.215 | 0.258 | 0.232 | 0.200 | 0.173 | 0.295 | 0.171 | 0.169 | 0.000 |       |       |
| MBG20 | 0.244 | 0.234 | 0.209 | 0.210 | 0.338 | 0.280 | 0.198 | 0.209 | 0.209 | 0.232 | 0.218 | 0.250 | 0.211 | 0.169 | 0.209 | 0.275 | 0.240 | 0.182 | 0.169 | 0.000 |       |
| MBG21 | 0.273 | 0.238 | 0.236 | 0.288 | 0.346 | 0.286 | 0.212 | 0.273 | 0.235 | 0.325 | 0.174 | 0.243 | 0.262 | 0.240 | 0.188 | 0.305 | 0.256 | 0.241 | 0.228 | 0.254 | 0.000 |

Table S4: Genetic diversity within lupin ‘Minaret’ variety obtained by combination of RAPD, ISSR and REMAP data

|       | Min1  | Min2  | Min3  | Min4  | Min5  | Min6  | Min7  | Min8  | Min9  | Min10 | Min11 | Min12 | Min13 | Min14 | Min15 | Min16 | Min17 | Min18 | Min19 | Min20 | Min21 | Min22 | Min23 | Min24 | Min25 | Min26 | Min27 | Min28 | Min29 |
|-------|-------|-------|-------|-------|-------|-------|-------|-------|-------|-------|-------|-------|-------|-------|-------|-------|-------|-------|-------|-------|-------|-------|-------|-------|-------|-------|-------|-------|-------|
| Min1  | 0.000 |       |       |       |       |       |       |       |       |       |       |       |       |       |       |       |       |       |       |       |       |       |       |       |       |       |       |       |       |
| Min2  | 0.181 | 0.000 |       |       |       |       |       |       |       |       |       |       |       |       |       |       |       |       |       |       |       |       |       |       |       |       |       |       |       |
| Min3  | 0.169 | 0.163 | 0.000 |       |       |       |       |       |       |       |       |       |       |       |       |       |       |       |       |       |       |       |       |       |       |       |       |       |       |
| Min4  | 0.202 | 0.219 | 0.195 | 0.000 |       |       |       |       |       |       |       |       |       |       |       |       |       |       |       |       |       |       |       |       |       |       |       |       |       |
| Min5  | 0.154 | 0.193 | 0.171 | 0.202 | 0.000 |       |       |       |       |       |       |       |       |       |       |       |       |       |       |       |       |       |       |       |       |       |       |       |       |
| Min6  | 0.224 | 0.193 | 0.170 | 0.214 | 0.178 | 0.000 |       |       |       |       |       |       |       |       |       |       |       |       |       |       |       |       |       |       |       |       |       |       |       |
| Min7  | 0.179 | 0.149 | 0.172 | 0.181 | 0.148 | 0.121 | 0.000 |       |       |       |       |       |       |       |       |       |       |       |       |       |       |       |       |       |       |       |       |       |       |
| Min8  | 0.207 | 0.189 | 0.189 | 0.209 | 0.207 | 0.195 | 0.186 | 0.000 |       |       |       |       |       |       |       |       |       |       |       |       |       |       |       |       |       |       |       |       |       |
| Min9  | 0.195 | 0.236 | 0.200 | 0.173 | 0.195 | 0.207 | 0.126 | 0.214 | 0.000 |       |       |       |       |       |       |       |       |       |       |       |       |       |       |       |       |       |       |       |       |
| Min10 | 0.195 | 0.165 | 0.165 | 0.174 | 0.173 | 0.172 | 0.140 | 0.191 | 0.153 | 0.000 |       |       |       |       |       |       |       |       |       |       |       |       |       |       |       |       |       |       |       |
| Min10 | 0.195 | 0.200 | 0.166 | 0.186 | 0.174 | 0.149 | 0.130 | 0.202 | 0.155 | 0.145 | 0.000 |       |       |       |       |       |       |       |       |       |       |       |       |       |       |       |       |       |       |
| Min12 | 0.168 | 0.234 | 0.162 | 0.183 | 0.170 | 0.217 | 0.195 | 0.188 | 0.163 | 0.224 | 0.176 | 0.000 |       |       |       |       |       |       |       |       |       |       |       |       |       |       |       |       |       |
| Min13 | 0.146 | 0.130 | 0.141 | 0.161 | 0.161 | 0.182 | 0.151 | 0.156 | 0.200 | 0.177 | 0.178 | 0.163 | 0.000 |       |       |       |       |       |       |       |       |       |       |       |       |       |       |       |       |
| Min14 | 0.123 | 0.164 | 0.107 | 0.149 | 0.183 | 0.205 | 0.151 | 0.189 | 0.176 | 0.166 | 0.156 | 0.128 | 0.099 | 0.000 |       |       |       |       |       |       |       |       |       |       |       |       |       |       |       |
| Min15 | 0.214 | 0.184 | 0.207 | 0.240 | 0.235 | 0.272 | 0.227 | 0.220 | 0.257 | 0.244 | 0.243 | 0.243 | 0.117 | 0.173 | 0.000 |       |       |       |       |       |       |       |       |       |       |       |       |       |       |
| Min16 | 0.200 | 0.193 | 0.193 | 0.226 | 0.200 | 0.200 | 0.191 | 0.230 | 0.207 | 0.207 | 0.184 | 0.229 | 0.170 | 0.182 | 0.214 | 0.000 |       |       |       |       |       |       |       |       |       |       |       |       |       |
| Min17 | 0.250 | 0.241 | 0.241 | 0.265 | 0.269 | 0.248 | 0.238 | 0.267 | 0.232 | 0.269 | 0.217 | 0.216 | 0.227 | 0.215 | 0.263 | 0.223 | 0.000 |       |       |       |       |       |       |       |       |       |       |       |       |
| Min18 | 0.165 | 0.182 | 0.148 | 0.191 | 0.146 | 0.200 | 0.124 | 0.173 | 0.160 | 0.161 | 0.151 | 0.170 | 0.138 | 0.138 | 0.225 | 0.166 | 0.247 | 0.000 |       |       |       |       |       |       |       |       |       |       |       |
| Min19 | 0.198 | 0.157 | 0.146 | 0.189 | 0.187 | 0.175 | 0.167 | 0.238 | 0.205 | 0.205 | 0.182 | 0.179 | 0.115 | 0.126 | 0.178 | 0.186 | 0.232 | 0.143 | 0.000 |       |       |       |       |       |       |       |       |       |       |
| Min20 | 0.195 | 0.189 | 0.189 | 0.175 | 0.185 | 0.184 | 0.143 | 0.180 | 0.214 | 0.191 | 0.180 | 0.211 | 0.135 | 0.157 | 0.165 | 0.173 | 0.217 | 0.141 | 0.118 | 0.000 |       |       |       |       |       |       |       |       |       |
| Min21 | 0.197 | 0.215 | 0.190 | 0.175 | 0.233 | 0.235 | 0.176 | 0.241 | 0.154 | 0.155 | 0.157 | 0.215 | 0.202 | 0.155 | 0.236 | 0.198 | 0.208 | 0.186 | 0.207 | 0.193 | 0.000 |       |       |       |       |       |       |       |       |
| Min22 | 0.216 | 0.220 | 0.209 | 0.207 | 0.194 | 0.205 | 0.207 | 0.211 | 0.212 | 0.189 | 0.178 | 0.233 | 0.165 | 0.187 | 0.184 | 0.159 | 0.252 | 0.182 | 0.169 | 0.178 | 0.167 | 0.000 |       |       |       |       |       |       |       |
| Min23 | 0.205 | 0.232 | 0.186 | 0.172 | 0.183 | 0.227 | 0.173 | 0.233 | 0.165 | 0.200 | 0.133 | 0.163 | 0.165 | 0.165 | 0.251 | 0.205 | 0.264 | 0.149 | 0.169 | 0.189 | 0.190 | 0.176 | 0.000 |       |       |       |       |       |       |
| Min24 | 0.208 | 0.224 | 0.212 | 0.235 | 0.253 | 0.195 | 0.198 | 0.274 | 0.266 | 0.227 | 0.226 | 0.275 | 0.176 | 0.176 | 0.246 | 0.159 | 0.232 | 0.183 | 0.181 | 0.179 | 0.192 | 0.212 | 0.224 | 0.000 |       |       |       |       |       |
| Min25 | 0.241 | 0.233 | 0.233 | 0.254 | 0.204 | 0.216 | 0.184 | 0.246 | 0.236 | 0.247 | 0.223 | 0.246 | 0.198 | 0.220 | 0.264 | 0.228 | 0.316 | 0.170 | 0.191 | 0.178 | 0.252 | 0.209 | 0.164 | 0.224 | 0.000 |       |       |       |       |
| Min26 | 0.202 | 0.207 | 0.160 | 0.205 | 0.225 | 0.214 | 0.170 | 0.198 | 0.210 | 0.234 | 0.198 | 0.183 | 0.172 | 0.172 | 0.216 | 0.238 | 0.277 | 0.145 | 0.177 | 0.198 | 0.200 | 0.230 | 0.172 | 0.235 | 0.195 | 0.000 |       |       |       |
| Min27 | 0.190 | 0.195 | 0.149 | 0.205 | 0.158 | 0.168 | 0.148 | 0.209 | 0.198 | 0.209 | 0.164 | 0.160 | 0.140 | 0.128 | 0.216 | 0.202 | 0.200 | 0.146 | 0.144 | 0.165 | 0.212 | 0.207 | 0.184 | 0.210 | 0.230 | 0.170 | 0.000 |       |       |
| Min28 | 0.205 | 0.277 | 0.164 | 0.207 | 0.194 | 0.182 | 0.207 | 0.211 | 0.235 | 0.246 | 0.211 | 0.198 | 0.187 | 0.165 | 0.218 | 0.205 | 0.288 | 0.171 | 0.180 | 0.157 | 0.250 | 0.198 | 0.253 | 0.224 | 0.186 | 0.172 | 0.162 | 0.000 |       |
| Min29 | 0.159 | 0.176 | 0.200 | 0.210 | 0.184 | 0.207 | 0.163 | 0.202 | 0.166 | 0.190 | 0.179 | 0.188 | 0.143 | 0.166 | 0.221 | 0.172 | 0.231 | 0.172 | 0.193 | 0.191 | 0.205 | 0.177 | 0.177 | 0.239 | 0.235 | 0.210 | 0.209 | 0.246 | 0.000 |

Table S5: Genetic diversity within hogweed Moscow invasive population obtained by combination of RAPD, ISSR and REMAP data

|        | Mosc1 | Mosc2 | Mosc3 | Mosc4 | Mosc5 | Mosc6 | Mosc7 | Mosc8 | Mosc9 | Mosc10 | Mosc11 | Mosc12 | Mosc13 | Mosc14 | Mosc15 |
|--------|-------|-------|-------|-------|-------|-------|-------|-------|-------|--------|--------|--------|--------|--------|--------|
| Mosc1  | 0.000 |       |       |       |       |       |       |       |       |        |        |        |        |        |        |
| Mosc2  | 0.447 | 0.000 |       |       |       |       |       |       |       |        |        |        |        |        |        |
| Mosc3  | 0.531 | 0.378 | 0.000 |       |       |       |       |       |       |        |        |        |        |        |        |
| Mosc4  | 0.375 | 0.566 | 0.522 | 0.000 |       |       |       |       |       |        |        |        |        |        |        |
| Mosc5  | 0.333 | 0.404 | 0.385 | 0.333 | 0.000 |       |       |       |       |        |        |        |        |        |        |
| Mosc6  | 0.400 | 0.349 | 0.458 | 0.363 | 0.440 | 0.000 |       |       |       |        |        |        |        |        |        |
| Mosc7  | 0.393 | 0.469 | 0.370 | 0.440 | 0.457 | 0.500 | 0.000 |       |       |        |        |        |        |        |        |
| Mosc8  | 0.500 | 0.422 | 0.360 | 0.478 | 0.462 | 0.375 | 0.460 | 0.000 |       |        |        |        |        |        |        |
| Mosc9  | 0.360 | 0.349 | 0.333 | 0.364 | 0.400 | 0.391 | 0.569 | 0.292 | 0.000 |        |        |        |        |        |        |
| Mosc10 | 0.347 | 0.333 | 0.606 | 0.349 | 0.347 | 0.333 | 0.451 | 0.404 | 0.457 | 0.000  |        |        |        |        |        |
| Mosc11 | 0.255 | 0.273 | 0.429 | 0.244 | 0.333 | 0.362 | 0.358 | 0.551 | 0.519 | 0.348  | 0.000  |        |        |        |        |
| Mosc12 | 0.412 | 0.409 | 0.347 | 0.467 | 0.451 | 0.447 | 0.396 | 0.265 | 0.362 | 0.345  | 0.458  | 0.000  |        |        |        |
| Mosc13 | 0.422 | 0.526 | 0.442 | 0.436 | 0.467 | 0.366 | 0.404 | 0.442 | 0.366 | 0.550  | 0.381  | 0.333  | 0.000  |        |        |
| Mosc14 | 0.429 | 0.476 | 0.489 | 0.349 | 0.429 | 0.378 | 0.412 | 0.362 | 0.422 | 0.318  | 0.391  | 0.435  | 0.550  | 0.000  |        |
| Mosc15 | 0.250 | 0.388 | 0.222 | 0.360 | 0.321 | 0.385 | 0.217 | 0.333 | 0.346 | 0.333  | 0.321  | 0.358  | 0.404  | 0.333  | 0.000  |

Table S6: Genetic diversity within hogweed Peskovka invasive population obtained by combination of RAPD, ISSR and REMAP data

|        | Pesk1 | Pesk2 | Pesk3 | Pesk4 | Pesk5 | Pesk6 | Pesk7 | Pesk8 | Pesk9 | Pesk10 | Pesk11 | Pesk12 | Pesk13 | Pesk14 | Pesk15 | Pesk16 | Pesk17 | Pesk18 | Pesk19 | Pesk20 |
|--------|-------|-------|-------|-------|-------|-------|-------|-------|-------|--------|--------|--------|--------|--------|--------|--------|--------|--------|--------|--------|
| Pesk1  | 0.000 |       |       |       |       |       |       |       |       |        |        |        |        |        |        |        |        |        |        |        |
| Pesk2  | 0.469 | 0.000 |       |       |       |       |       |       |       |        |        |        |        |        |        |        |        |        |        |        |
| Pesk3  | 0.393 | 0.257 | 0.000 |       |       |       |       |       |       |        |        |        |        |        |        |        |        |        |        |        |
| Pesk4  | 0.451 | 0.385 | 0.474 | 0.000 |       |       |       |       |       |        |        |        |        |        |        |        |        |        |        |        |
| Pesk5  | 0.434 | 0.343 | 0.322 | 0.407 | 0.000 |       |       |       |       |        |        |        |        |        |        |        |        |        |        |        |
| Pesk6  | 0.600 | 0.438 | 0.464 | 0.490 | 0.678 | 0.000 |       |       |       |        |        |        |        |        |        |        |        |        |        |        |
| Pesk7  | 0.509 | 0.296 | 0.333 | 0.448 | 0.433 | 0.368 | 0.000 |       |       |        |        |        |        |        |        |        |        |        |        |        |
| Pesk8  | 0.519 | 0.382 | 0.400 | 0.418 | 0.333 | 0.481 | 0.410 | 0.000 |       |        |        |        |        |        |        |        |        |        |        |        |
| Pesk9  | 0.571 | 0.286 | 0.355 | 0.474 | 0.423 | 0.536 | 0.270 | 0.333 | 0.000 |        |        |        |        |        |        |        |        |        |        |        |
| Pesk10 | 0.551 | 0.460 | 0.418 | 0.480 | 0.577 | 0.224 | 0.393 | 0.472 | 0.527 | 0.000  |        |        |        |        |        |        |        |        |        |        |
| Pesk11 | 0.533 | 0.324 | 0.333 | 0.443 | 0.429 | 0.433 | 0.343 | 0.375 | 0.333 | 0.356  | 0.000  |        |        |        |        |        |        |        |        |        |
| Pesk12 | 0.448 | 0.333 | 0.406 | 0.424 | 0.410 | 0.483 | 0.292 | 0.355 | 0.313 | 0.474  | 0.265  | 0.000  |        |        |        |        |        |        |        |        |
| Pesk13 | 0.429 | 0.403 | 0.362 | 0.344 | 0.455 | 0.397 | 0.371 | 0.373 | 0.420 | 0.419  | 0.260  | 0.380  | 0.000  |        |        |        |        |        |        |        |
| Pesk14 | 0.410 | 0.333 | 0.284 | 0.419 | 0.313 | 0.574 | 0.382 | 0.446 | 0.403 | 0.600  | 0.437  | 0.333  | 0.324  | 0.000  |        |        |        |        |        |        |
| Pesk15 | 0.460 | 0.247 | 0.362 | 0.344 | 0.394 | 0.397 | 0.343 | 0.373 | 0.391 | 0.516  | 0.397  | 0.408  | 0.342  | 0.324  | 0.000  |        |        |        |        |        |
| Pesk16 | 0.370 | 0.441 | 0.467 | 0.491 | 0.368 | 0.630 | 0.508 | 0.379 | 0.500 | 0.585  | 0.438  | 0.355  | 0.493  | 0.385  | 0.373  | 0.000  |        |        |        |        |
| Pesk17 | 0.500 | 0.364 | 0.448 | 0.547 | 0.455 | 0.500 | 0.356 | 0.429 | 0.448 | 0.569  | 0.548  | 0.433  | 0.508  | 0.397  | 0.292  | 0.429  | 0.000  |        |        |        |
| Pesk18 | 0.451 | 0.342 | 0.294 | 0.429 | 0.385 | 0.484 | 0.362 | 0.394 | 0.500 | 0.541  | 0.417  | 0.371  | 0.333  | 0.260  | 0.253  | 0.364  | 0.344  | 0.000  |        |        |
| Pesk19 | 0.481 | 0.529 | 0.567 | 0.418 | 0.474 | 0.556 | 0.443 | 0.414 | 0.467 | 0.585  | 0.469  | 0.323  | 0.373  | 0.446  | 0.343  | 0.345  | 0.393  | 0.303  | 0.000  |        |
| Pesk20 | 0.538 | 0.455 | 0.448 | 0.434 | 0.491 | 0.462 | 0.390 | 0.500 | 0.448 | 0.608  | 0.419  | 0.433  | 0.354  | 0.365  | 0.323  | 0.536  | 0.407  | 0.375  | 0.357  | 0.000  |



Table S7: Genetic diversity within hogweed Kiev invasive population obtained by combination of RAPD, ISSR and REMAP data

|        | Kiev1 | Kiev2 | Kiev3 | Kiev4 | Kiev5 | Kiev6 | Kiev7 | Kiev8 | Kiev9 | Kiev10 | Kiev11 | Kiev12 | Kiev13 | Kiev14 | Kiev15 | Kiev16 | Kiev17 |
|--------|-------|-------|-------|-------|-------|-------|-------|-------|-------|--------|--------|--------|--------|--------|--------|--------|--------|
| Kiev1  | 0.000 |       |       |       |       |       |       |       |       |        |        |        |        |        |        |        |        |
| Kiev2  | 0.404 | 0.000 |       |       |       |       |       |       |       |        |        |        |        |        |        |        |        |
| Kiev3  | 0.456 | 0.516 | 0.000 |       |       |       |       |       |       |        |        |        |        |        |        |        |        |
| Kiev4  | 0.485 | 0.483 | 0.347 | 0.000 |       |       |       |       |       |        |        |        |        |        |        |        |        |
| Kiev5  | 0.423 | 0.622 | 0.426 | 0.475 | 0.000 |       |       |       |       |        |        |        |        |        |        |        |        |
| Kiev6  | 0.429 | 0.441 | 0.373 | 0.360 | 0.417 | 0.000 |       |       |       |        |        |        |        |        |        |        |        |
| Kiev7  | 0.447 | 0.463 | 0.295 | 0.483 | 0.435 | 0.462 | 0.000 |       |       |        |        |        |        |        |        |        |        |
| Kiev8  | 0.416 | 0.505 | 0.400 | 0.444 | 0.459 | 0.429 | 0.485 | 0.000 |       |        |        |        |        |        |        |        |        |
| Kiev9  | 0.379 | 0.473 | 0.500 | 0.490 | 0.386 | 0.431 | 0.429 | 0.455 | 0.000 |        |        |        |        |        |        |        |        |
| Kiev10 | 0.396 | 0.381 | 0.333 | 0.407 | 0.468 | 0.432 | 0.600 | 0.379 | 0.484 | 0.000  |        |        |        |        |        |        |        |
| Kiev11 | 0.373 | 0.540 | 0.500 | 0.468 | 0.402 | 0.510 | 0.333 | 0.491 | 0.417 | 0.483  | 0.000  |        |        |        |        |        |        |
| Kiev12 | 0.500 | 0.545 | 0.546 | 0.495 | 0.429 | 0.495 | 0.477 | 0.346 | 0.443 | 0.511  | 0.484  | 0.000  |        |        |        |        |        |
| Kiev13 | 0.406 | 0.551 | 0.469 | 0.417 | 0.354 | 0.460 | 0.371 | 0.500 | 0.265 | 0.473  | 0.298  | 0.453  | 0.000  |        |        |        |        |
| Kiev14 | 0.420 | 0.364 | 0.505 | 0.432 | 0.490 | 0.475 | 0.455 | 0.346 | 0.443 | 0.444  | 0.570  | 0.447  | 0.516  | 0.000  |        |        |        |
| Kiev15 | 0.468 | 0.537 | 0.473 | 0.416 | 0.457 | 0.462 | 0.317 | 0.485 | 0.451 | 0.452  | 0.356  | 0.300  | 0.438  | 0.432  | 0.000  |        |        |
| Kiev16 | 0.462 | 0.435 | 0.406 | 0.455 | 0.451 | 0.437 | 0.478 | 0.333 | 0.465 | 0.404  | 0.505  | 0.286  | 0.434  | 0.408  | 0.522  | 0.000  |        |
| Kiev17 | 0.366 | 0.506 | 0.469 | 0.438 | 0.374 | 0.500 | 0.483 | 0.407 | 0.347 | 0.516  | 0.426  | 0.432  | 0.292  | 0.411  | 0.506  | 0.414  | 0.000  |

Table S8: Genetic diversity within hogweed Zhitomir industrial zone invasive population obtained by combination of RAPD, ISSR and REMAP data

|           | Zh(ind)1 | Zh(ind)2 | Zh(ind)3 | Zh(ind)4 | Zh(ind)5 | Zh(ind)6 | Zh(ind)7 | Zh(ind)8 | Zh(ind)9 | Zh(ind)10 | Zh(ind)11 | Zh(ind)12 | Zh(ind)13 | Zh(ind)14 |
|-----------|----------|----------|----------|----------|----------|----------|----------|----------|----------|-----------|-----------|-----------|-----------|-----------|
| Zh(ind)1  | 0.000    |          |          |          |          |          |          |          |          |           |           |           |           |           |
| Zh(ind)2  | 0.344    | 0.000    |          |          |          |          |          |          |          |           |           |           |           |           |
| Zh(ind)3  | 0.469    | 0.487    | 0.000    |          |          |          |          |          |          |           |           |           |           |           |
| Zh(ind)4  | 0.397    | 0.388    | 0.624    | 0.000    |          |          |          |          |          |           |           |           |           |           |
| Zh(ind)5  | 0.407    | 0.467    | 0.447    | 0.420    | 0.000    |          |          |          |          |           |           |           |           |           |
| Zh(ind)6  | 0.397    | 0.405    | 0.419    | 0.333    | 0.375    | 0.000    |          |          |          |           |           |           |           |           |
| Zh(ind)7  | 0.365    | 0.387    | 0.491    | 0.410    | 0.388    | 0.640    | 0.000    |          |          |           |           |           |           |           |
| Zh(ind)8  | 0.385    | 0.469    | 0.389    | 0.396    | 0.449    | 0.424    | 0.242    | 0.000    |          |           |           |           |           |           |
| Zh(ind)9  | 0.424    | 0.418    | 0.416    | 0.421    | 0.533    | 0.471    | 0.514    | 0.406    | 0.000    |           |           |           |           |           |
| Zh(ind)10 | 0.424    | 0.538    | 0.216    | 0.453    | 0.449    | 0.531    | 0.407    | 0.467    | 0.453    | 0.000     |           |           |           |           |
| Zh(ind)11 | 0.519    | 0.579    | 0.590    | 0.520    | 0.600    | 0.536    | 0.513    | 0.379    | 0.456    | 0.455     | 0.000     |           |           |           |
| Zh(ind)12 | 0.328    | 0.275    | 0.504    | 0.353    | 0.318    | 0.414    | 0.317    | 0.457    | 0.492    | 0.364     | 0.276     | 0.000     |           |           |
| Zh(ind)13 | 0.496    | 0.446    | 0.565    | 0.480    | 0.574    | 0.528    | 0.540    | 0.415    | 0.429    | 0.529     | 0.431     | 0.581     | 0.000     |           |
| Zh(ind)14 | 0.469    | 0.504    | 0.431    | 0.452    | 0.512    | 0.452    | 0.456    | 0.420    | 0.487    | 0.450     | 0.504     | 0.520     | 0.304     | 0.000     |

Table S9: Genetic diversity within hogweed Zhitomir center invasive population obtained by combination of RAPD, ISSR and REMAP data

|           | Zh (c) 1 | Zh (c) 2 | Zh (c) 3 | Zh (c) 4 | Zh (c) 5 | Zh (c) 6 | Zh (c) 7 | Zh (c) 8 | Zh (c) 9 | Zh (c) 10 | Zh (c) 11 | Zh (c) 12 | Zh (c) 13 | Zh (c) 14 | Zh (c) 15 | Zh (c) 16 | Zh (c) 17 | Zh (c) 18 | Zh (c) 19 |
|-----------|----------|----------|----------|----------|----------|----------|----------|----------|----------|-----------|-----------|-----------|-----------|-----------|-----------|-----------|-----------|-----------|-----------|
| Zh (c) 1  | 0.000    |          |          |          |          |          |          |          |          |           |           |           |           |           |           |           |           |           |           |
| Zh (c) 2  | 0.483    | 0.000    |          |          |          |          |          |          |          |           |           |           |           |           |           |           |           |           |           |
| Zh (c) 3  | 0.560    | 0.406    | 0.000    |          |          |          |          |          |          |           |           |           |           |           |           |           |           |           |           |
| Zh (c) 4  | 0.516    | 0.480    | 0.476    | 0.000    |          |          |          |          |          |           |           |           |           |           |           |           |           |           |           |
| Zh (c) 5  | 0.443    | 0.440    | 0.610    | 0.520    | 0.000    |          |          |          |          |           |           |           |           |           |           |           |           |           |           |
| Zh (c) 6  | 0.490    | 0.385    | 0.436    | 0.524    | 0.495    | 0.000    |          |          |          |           |           |           |           |           |           |           |           |           |           |
| Zh (c) 7  | 0.458    | 0.500    | 0.462    | 0.475    | 0.466    | 0.472    | 0.000    |          |          |           |           |           |           |           |           |           |           |           |           |
| Zh (c) 8  | 0.491    | 0.388    | 0.474    | 0.468    | 0.514    | 0.517    | 0.455    | 0.000    |          |           |           |           |           |           |           |           |           |           |           |
| Zh (c) 9  | 0.538    | 0.424    | 0.393    | 0.477    | 0.358    | 0.474    | 0.482    | 0.475    | 0.000    |           |           |           |           |           |           |           |           |           |           |
| Zh (c) 10 | 0.467    | 0.414    | 0.434    | 0.407    | 0.528    | 0.426    | 0.395    | 0.445    | 0.436    | 0.000     |           |           |           |           |           |           |           |           |           |
| Zh (c) 11 | 0.451    | 0.429    | 0.475    | 0.468    | 0.417    | 0.465    | 0.474    | 0.505    | 0.456    | 0.481     | 0.000     |           |           |           |           |           |           |           |           |
| Zh (c) 12 | 0.576    | 0.417    | 0.402    | 0.471    | 0.519    | 0.248    | 0.456    | 0.434    | 0.405    | 0.482     | 0.469     | 0.000     |           |           |           |           |           |           |           |
| Zh (c) 13 | 0.375    | 0.419    | 0.462    | 0.495    | 0.406    | 0.472    | 0.440    | 0.491    | 0.407    | 0.450     | 0.495     | 0.534     | 0.000     |           |           |           |           |           |           |
| Zh (c) 14 | 0.448    | 0.278    | 0.532    | 0.445    | 0.455    | 0.629    | 0.450    | 0.400    | 0.484    | 0.442     | 0.426     | 0.528     | 0.400     | 0.000     |           |           |           |           |           |
| Zh (c) 15 | 0.485    | 0.488    | 0.352    | 0.540    | 0.412    | 0.477    | 0.446    | 0.532    | 0.468    | 0.382     | 0.500     | 0.481     | 0.606     | 0.421     | 0.000     |           |           |           |           |
| Zh (c) 16 | 0.486    | 0.429    | 0.434    | 0.500    | 0.509    | 0.478    | 0.450    | 0.546    | 0.453    | 0.254     | 0.462     | 0.500     | 0.486     | 0.457     | 0.436     | 0.000     |           |           |           |
| Zh (c) 17 | 0.464    | 0.392    | 0.486    | 0.520    | 0.333    | 0.439    | 0.465    | 0.477    | 0.450    | 0.473     | 0.355     | 0.442     | 0.465     | 0.471     | 0.490     | 0.436     | 0.000     |           |           |
| Zh (c) 18 | 0.519    | 0.409    | 0.393    | 0.477    | 0.413    | 0.316    | 0.463    | 0.458    | 0.431    | 0.436     | 0.476     | 0.315     | 0.444     | 0.406     | 0.413     | 0.419     | 0.468     | 0.000     |           |
| Zh (c) 19 | 0.479    | 0.419    | 0.558    | 0.475    | 0.505    | 0.434    | 0.480    | 0.491    | 0.519    | 0.486     | 0.432     | 0.495     | 0.260     | 0.400     | 0.505     | 0.505     | 0.505     | 0.444     | 0.000     |

Table S10: Genetic diversity within hogweed Caucasus native population obtained by combination of RAPD, ISSR and REMAP data

|       | Cau1  | Cau2  | Cau3  | Cau4  | Cau5  | Cau6  | Cau7  | Cau8  | Cau9  | Cau10 | Cau11 | Cau12 | Cau13 | Cau14 |
|-------|-------|-------|-------|-------|-------|-------|-------|-------|-------|-------|-------|-------|-------|-------|
| Cau1  | 0000  |       |       |       |       |       |       |       |       |       |       |       |       |       |
| Cau2  | 0.548 | 0000  |       |       |       |       |       |       |       |       |       |       |       |       |
| Cau3  | 0.553 | 0.455 | 0000  |       |       |       |       |       |       |       |       |       |       |       |
| Cau4  | 0.566 | 0.405 | 0.528 | 0000  |       |       |       |       |       |       |       |       |       |       |
| Cau5  | 0.570 | 0.469 | 0.354 | 0.500 | 0000  |       |       |       |       |       |       |       |       |       |
| Cau6  | 0.580 | 0.651 | 0.494 | 0.526 | 0.581 | 0000  |       |       |       |       |       |       |       |       |
| Cau7  | 0.529 | 0.511 | 0.363 | 0.600 | 0.244 | 0.538 | 0000  |       |       |       |       |       |       |       |
| Cau8  | 0.506 | 0.578 | 0.516 | 0.425 | 0.511 | 0.564 | 0.585 | 0000  |       |       |       |       |       |       |
| Cau9  | 0.500 | 0.548 | 0.532 | 0.739 | 0.355 | 0.580 | 0.318 | 0.529 | 0000  |       |       |       |       |       |
| Cau10 | 0.535 | 0.538 | 0.500 | 0.506 | 0.473 | 0.620 | 0.566 | 0.325 | 0.458 | 0000  |       |       |       |       |
| Cau11 | 0.500 | 0.567 | 0.492 | 0.494 | 0.464 | 0.553 | 0.467 | 0.461 | 0.413 | 0.511 | 0000  |       |       |       |
| Cau12 | 0.485 | 0.392 | 0.515 | 0.565 | 0.529 | 0.511 | 0.468 | 0.532 | 0.546 | 0.516 | 0.426 | 0000  |       |       |
| Cau13 | 0.515 | 0.370 | 0.505 | 0.531 | 0.481 | 0.479 | 0.520 | 0.540 | 0.515 | 0.564 | 0.402 | 0.339 | 0000  |       |
| Cau14 | 0.511 | 0.495 | 0.520 | 0.596 | 0.556 | 0.586 | 0.538 | 0.560 | 0.553 | 0.522 | 0.490 | 0.379 | 0.358 | 0000  |

1. Osipova, E.S.; Koveza, O.V.; Troitskij, A.V.; Dolgikh, Y.I.; Shamina, Z.B.; Gostimskij, S.A. Analysis of specific RAPD and ISSR fragments in maize (*Zea mays* L.) somaclones and development of SCAR markers on their basis. *Russ. J. Genet.* **2003**, *39*, 1412–1419, doi:10.1023/B:RUGE.0000009156.74246.bc.
2. Motawei, M.I.; Al-Doss, A.A.; Moustafa, K.A. Genetic diversity among selected wheat lines differing in heat tolerance using molecular markers. *J. Food, Agric. Environ.* **2007**, *5*, 180–183.
3. El Maati F.B.; Jlibéne, M.; Moumni M. Study of the polymorphism of common wheat using ISSR markers. *Int. J. food, Agric. Environ.* **2004**, *2*, 121–125.
4. Dolgikh, Yu.I.; Solov'eva, A.I.; Tereshonok, D.V. Variability of DNA markers in *Arabidopsis thaliana* cultured cells under standard growing conditions and under the influence of stressors. *Biology Bulletin* **2017**, *44*, 120–127, doi:10.1134/S1062359017020042.
5. Galaev, A.V.; Babayants, L.T.; Sivolap, Y.M. Detection of the introgression of genome elements of the *Aegilops cylindrica* Host. into the *Triticum aestivum* L. genome by ISSR and SSR analysis. *Genetika* **2004**, *40*, 1654–1661, doi:10.1007/s11177-005-0007-y.
6. Queen, R.A.; Gribbon, B.M.; James, C.; Jack, P.; Flavell, A.J. Retrotransposon-based molecular markers for linkage and genetic diversity analysis in wheat. *Mol. Genet. Genomics* **2004**, *271*, 91–97, doi:10.1007/s00438-003-0960-x.
